# Supplementary material for: The Antimethanogenic Potentials of Plant Extracts: Their Yields and Phytochemical Compositions as Affected by Extractive Solvents
Source: MDPI journal article supplement (doi:10.3390/plants11233296), 2022-11-29
Supplement: s1 [file s1]

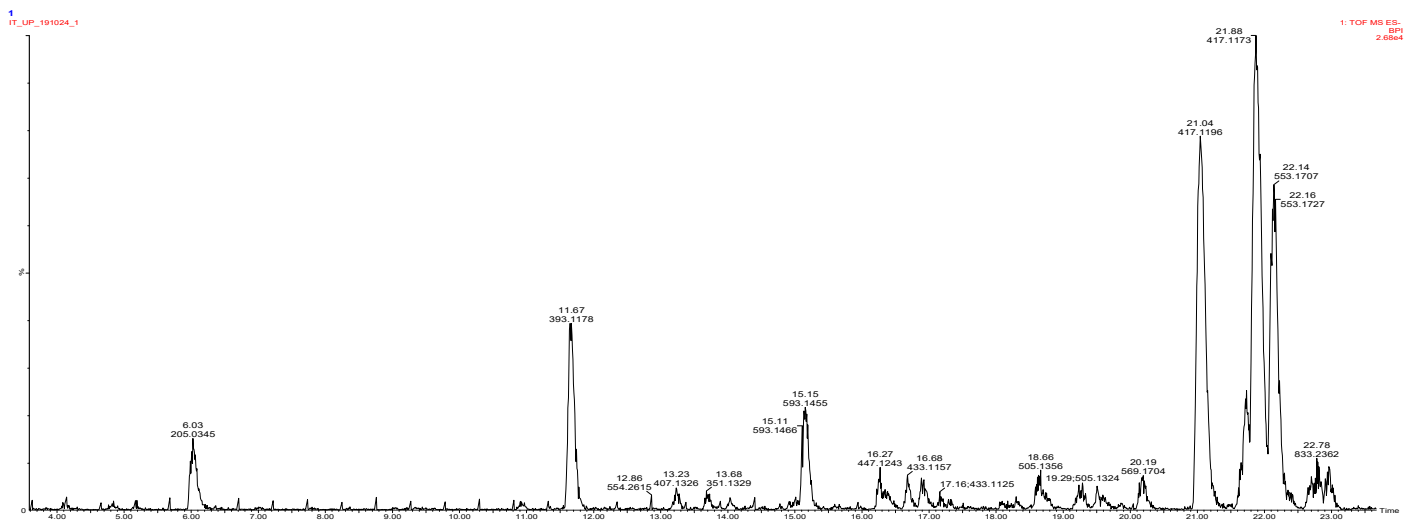

Figure SA1. *Aloe vera* 70% CH<sub>3</sub>OH solvent extraction.

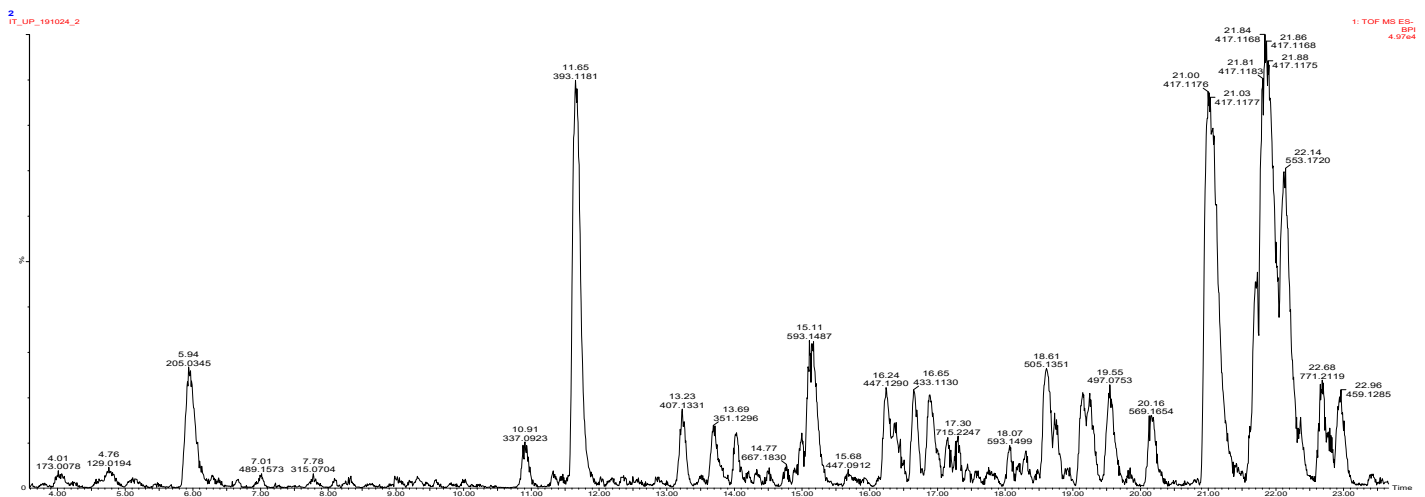

Figure SA2. *Aloe vera* 85% CH<sub>3</sub>OH solvent extraction.

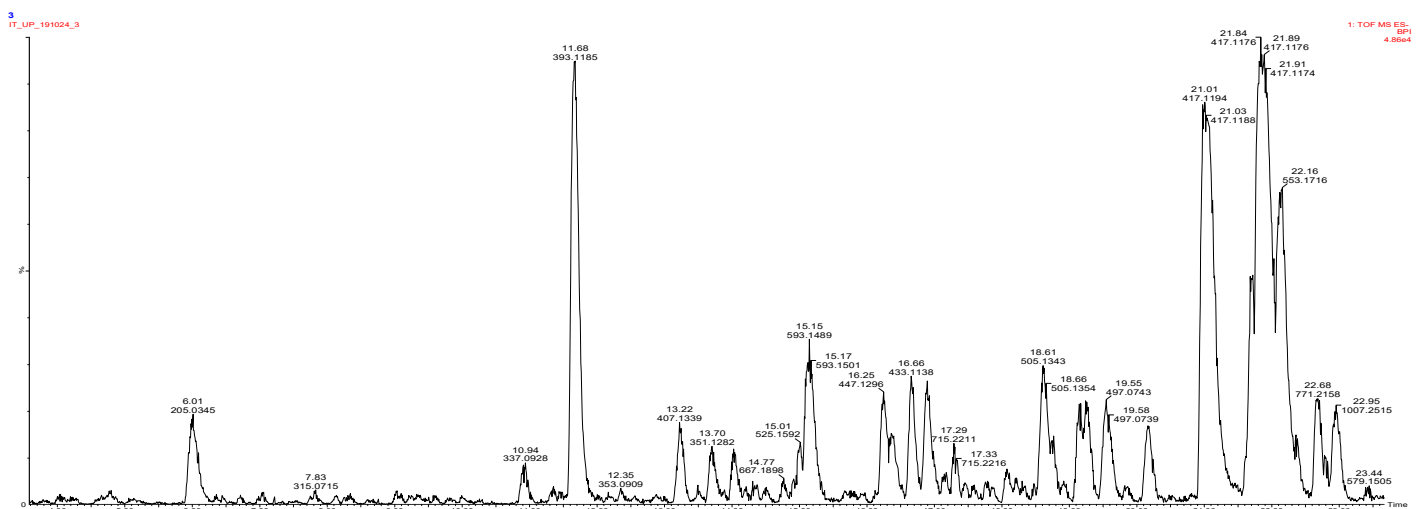

Figure SA3. *Aloe vera* 100% CH<sub>3</sub>OH solvent extraction.

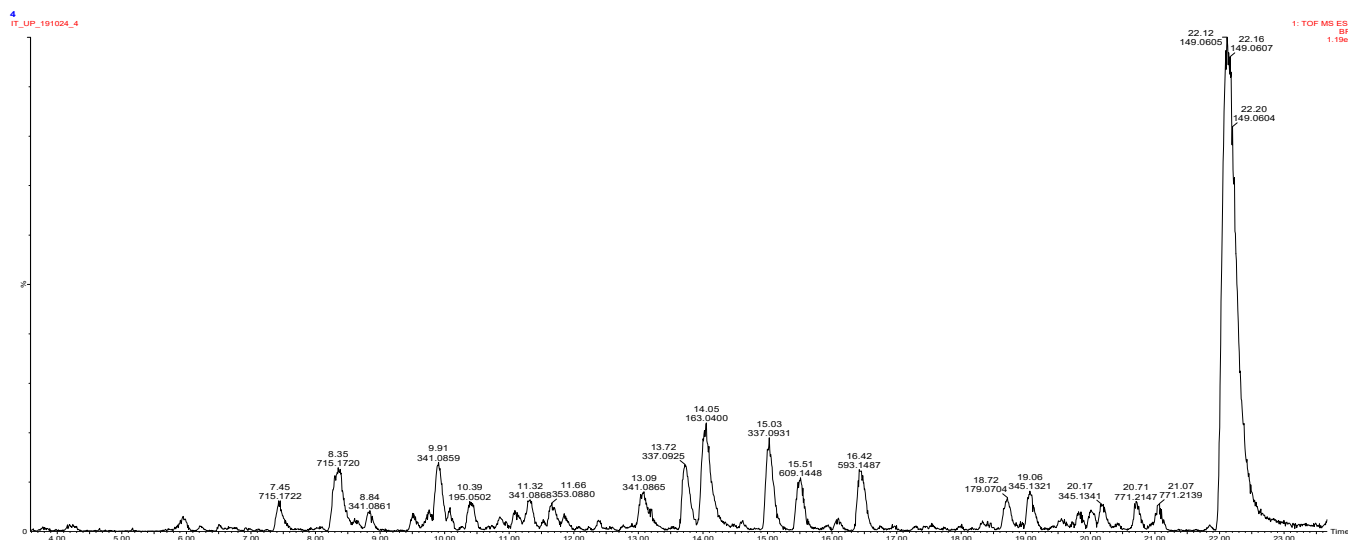

Figure SP1. Piper betle 70% CH3OH solvent extraction.

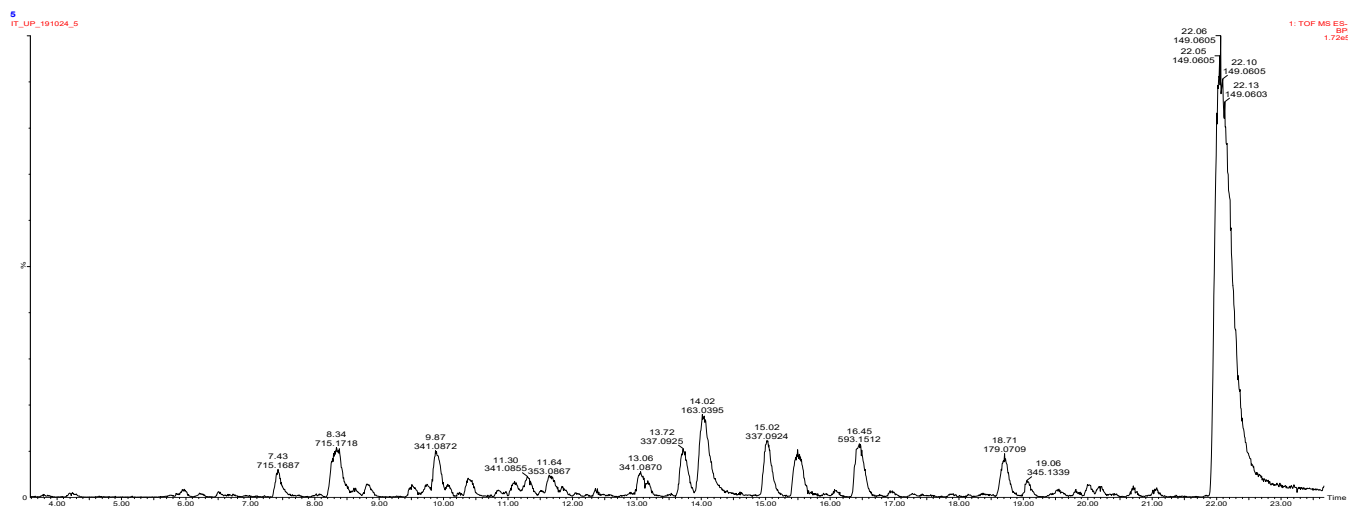

Figure SP2. Piper betle 85% CH3OH solvent extraction.

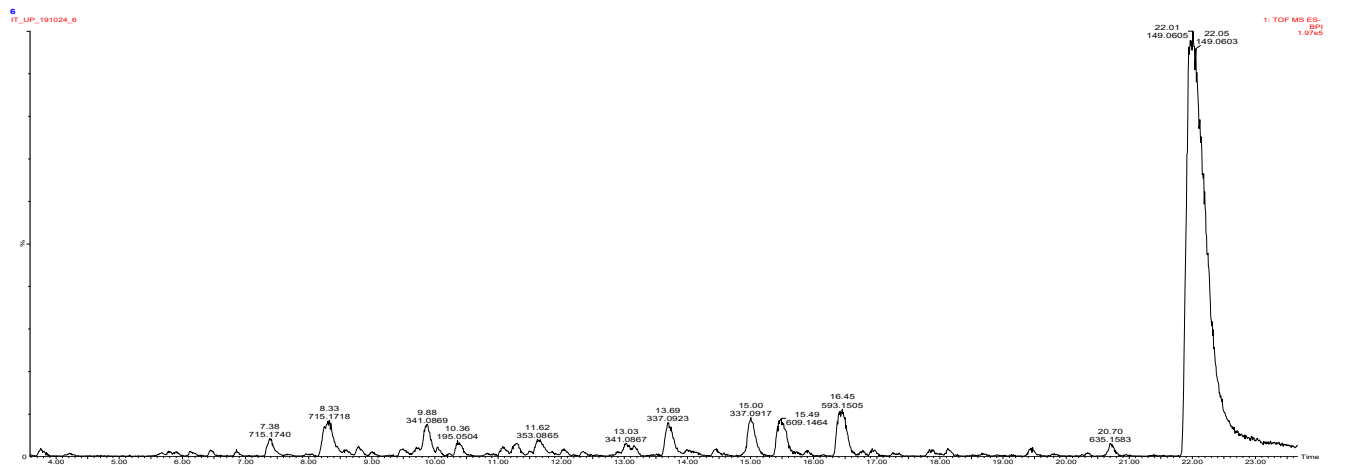

Figure SP3. Piper betle 100% CH3OH solvent extraction.

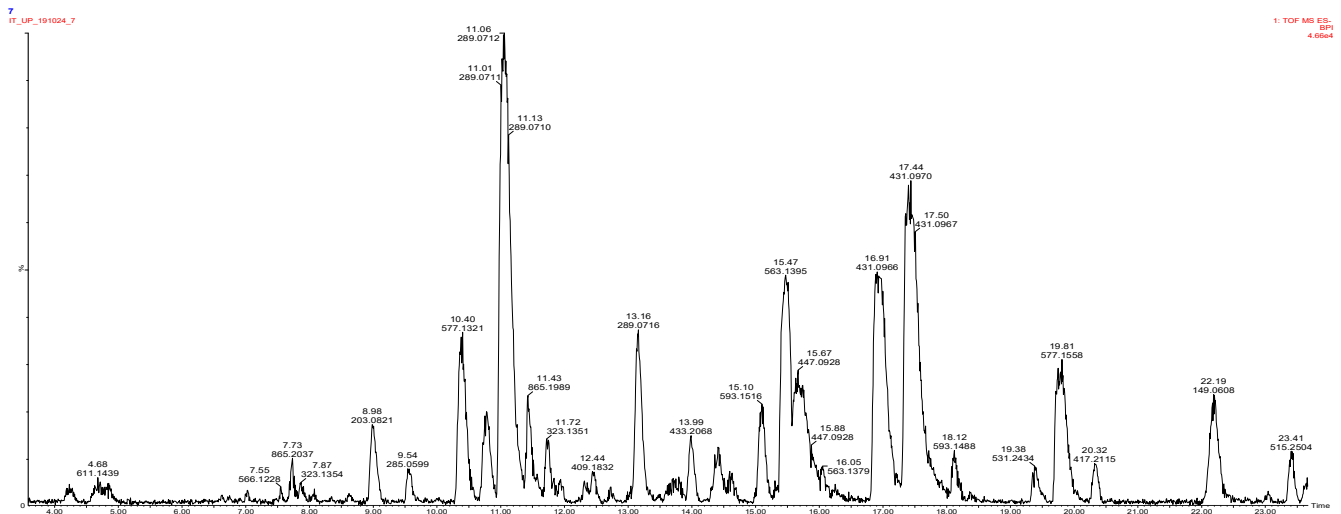

Figure SJ1. *Jatropha curcas* 70% CH<sub>3</sub>OH solvent extraction.

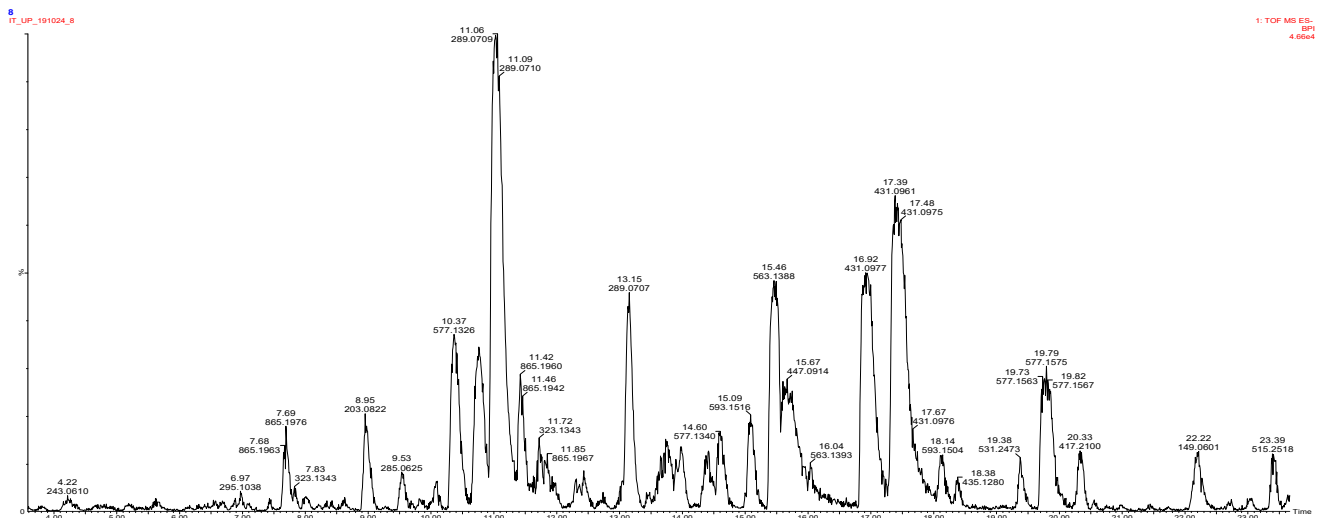

Figure SJ2. *Jatropha curcas* 85% CH<sub>3</sub>OH solvent extraction.

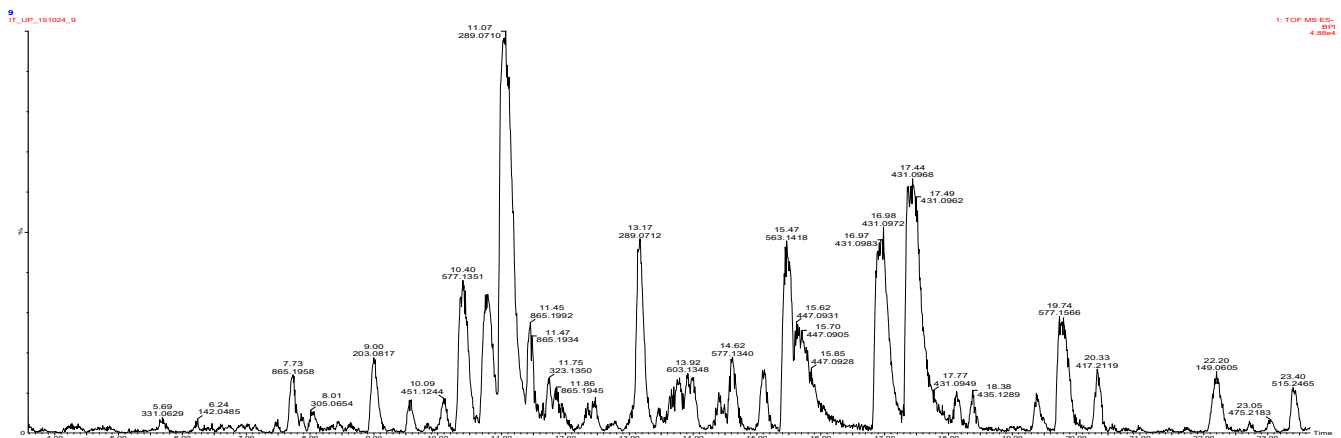

Figure SJ3. *Jatropha curcas* 100% CH<sub>3</sub>OH solvent extraction.

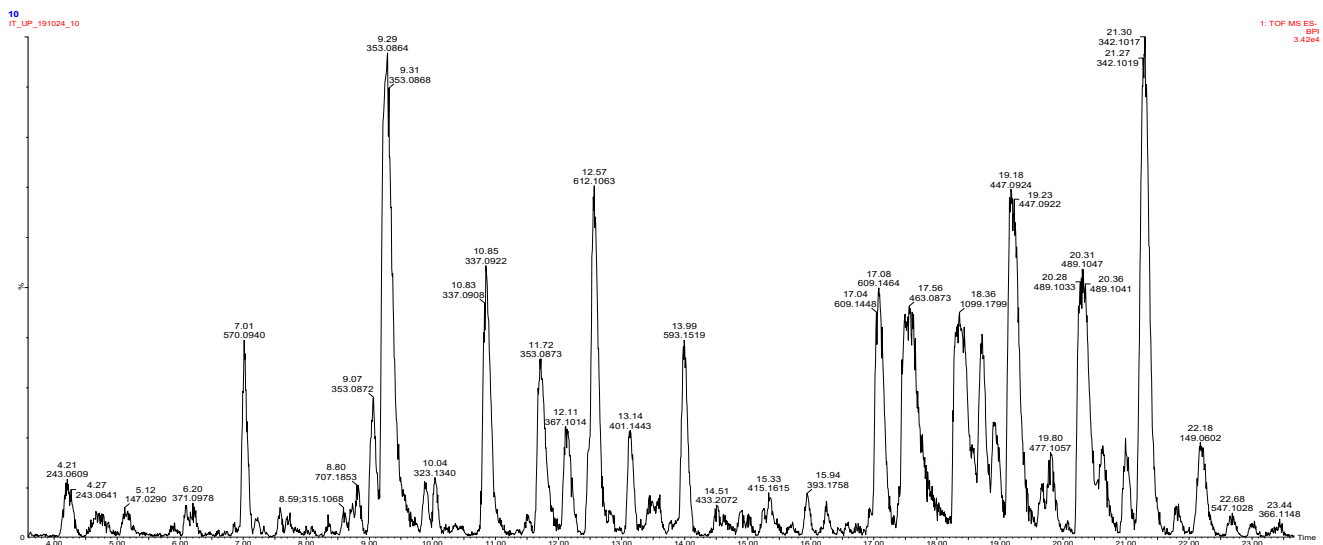

Figure SM1. *Moringa oleifera* 70%CH<sub>3</sub>OH solvent extraction.

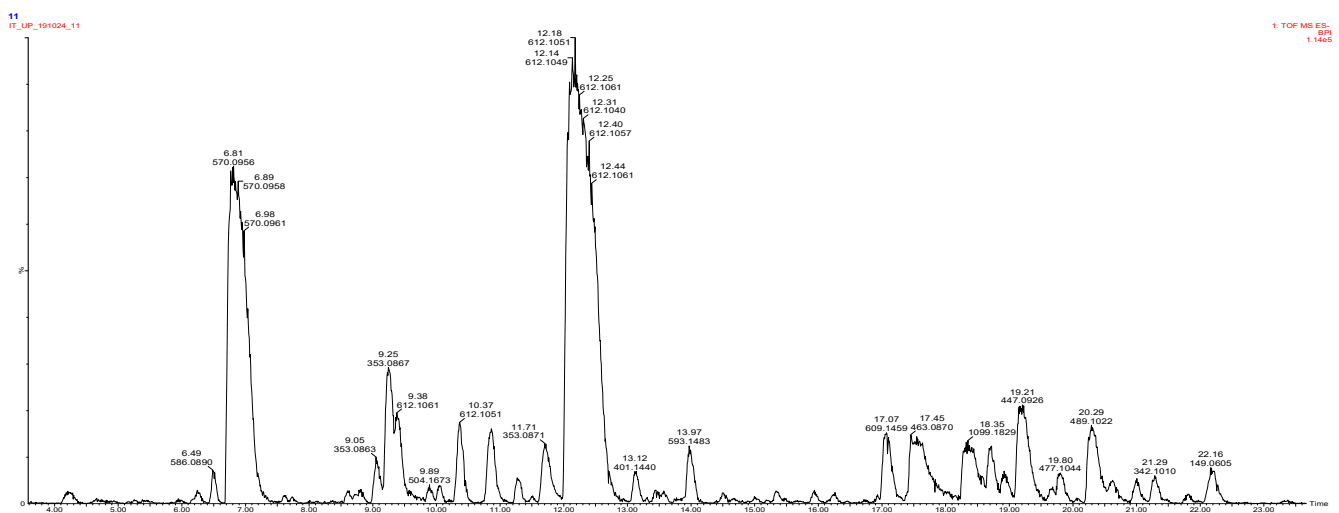

Figure SM2. *Moringa oleifera* 85%CH<sub>3</sub>OH solvent extraction.

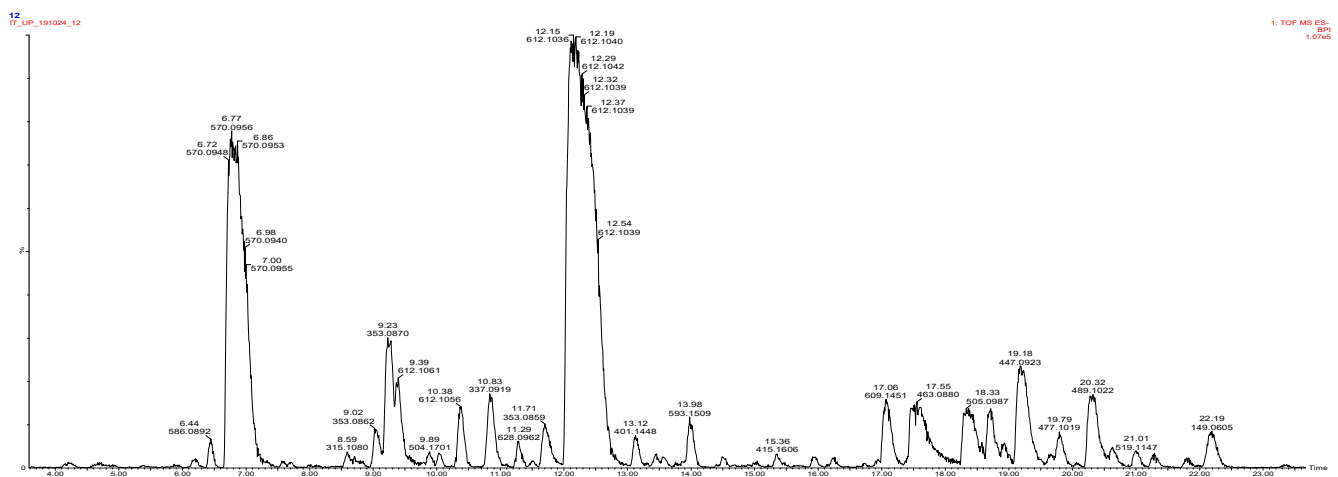

Figure SM3. *Moringa oleifera* 100%CH<sub>3</sub>OH solvent extraction.

**Table S1.** Correlation showing the effects of extraction solvents, extract yields and phytochemicals of plant extracts on CH<sub>4</sub> emission, TGP and IVOMD of *Eragrostis curvula* hay.

| Variable/metabolites                                | %CH <sub>4</sub> -Re | TGP   | CH <sub>4</sub> /TGP | OMD    | TGP/OMD | CH <sub>4</sub> /OMD | EY     |        |
|-----------------------------------------------------|----------------------|-------|----------------------|--------|---------|----------------------|--------|--------|
| <b><i>Aloe vera</i></b>                             |                      |       |                      |        |         |                      |        |        |
| %CH <sub>4</sub> -Re (percentage methane reduction) | 1                    |       |                      |        |         |                      |        |        |
| TGP (total gas production)                          | .544                 | 1     |                      |        |         |                      |        |        |
| CH <sub>4</sub> /TGP                                | -.980**              | -.698 | 1                    |        |         |                      |        |        |
| OMD (organic matter digestibility)                  | -.385                | -.071 | .344                 | 1      |         |                      |        |        |
| TGP/OMD                                             | .537                 | .973* | -.686                | -.283  | 1       |                      |        |        |
| CH <sub>4</sub> /OMD                                | -.997**              | -.538 | .977*                | .316   | -.514   | 1                    |        |        |
| Extract Yield (EY)                                  | -.750                | .997* | -.815                | .368   | .927    | .506                 | 1      |        |
| Aloin A (AA)                                        | .930*                | .205  | -.841                | -.487  | .226    | -.924*               | -.992* | -.992* |
| Aloin B (AB)                                        | AB                   | .900* | .128                 | -.798  | -.477   | .149                 | -.895  | -.990* |
| Aloe emodin (AE)                                    | .815                 | -.041 | -.685                | -.461  | -.018   | -.811                | -.990* |        |
| Aloesin (Alos)                                      | .771                 | -.104 | -.633                | -.516  | -.063   | -.762                | -.999* |        |
| Caffeoyl ester of aloesin (Ce)                      | .698                 | -.213 | -.546                | -.494  | -.170   | -.691                | -.999* |        |
| 3- <i>p</i> -coumaroylquinic acid (Ci)              | .769                 | .681  | -.816                | .262   | .538    | -.807                | .470   |        |
| Hydroxyaloin A (HA)                                 | .693                 | -.987 | .861                 | -.444  | -.893   | -.433                | -.997* |        |
| Hydroxyaloin B (HB)                                 | .654                 | -.246 | -.499                | -.591  | -.174   | -.637                | -.995* |        |
| Kaempferol hexoside                                 | .901*                | .845  | -.967*               | -.193  | .805    | -.904*               | .943   |        |
| Nataloin A (NA)                                     | .677                 | -.239 | -.521                | -.502  | -.193   | -.668                | -.999* |        |
| Nataloin B (NB)                                     | .678                 | -.237 | -.522                | -.509  | -.189   | -.669                | 1.00** |        |
| <b><i>Jatropha curcas</i></b>                       |                      |       |                      |        |         |                      |        |        |
| %CH <sub>4</sub> -Re (percentage methane reduction) | 1                    |       |                      |        |         |                      |        |        |
| TGP (total gas production)                          | .131                 | 1     |                      |        |         |                      |        |        |
| CH <sub>4</sub> /TGP                                | -.947*               | -.443 | 1                    |        |         |                      |        |        |
| OMD (organic matter digestibility)                  | .271                 | -.101 | -.197                | 1      |         |                      |        |        |
| TGP/OMD                                             | -.031                | .910* | -.274                | -.503  | 1       |                      |        |        |
| CH <sub>4</sub> /OMD                                | -.992**              | -.109 | .930*                | -.391  | .098    | 1                    |        |        |
| Extract Yield (EY)                                  | -.358                | .740  | -.975                | .549   | .393    | .076                 | 1      |        |
| Apigenin (Api)                                      | .960*                | .386  | -.995**              | .133   | .249    | -.935*               | .788   |        |
| Catechin (Ca)                                       | .964*                | .342  | -.985**              | .085   | .230    | -.932*               | -.996* |        |
| Epicatechin (Epi)                                   | .935*                | .220  | -.923*               | -.084  | .193    | -.883                | -.980  |        |
| Kaempferol hexoside                                 | .955*                | .406  | -.994**              | .304   | .198    | -.952*               | .788   |        |
| Procyanidin dimer B1 (PDB1)                         | .957*                | .325  | -.975*               | .035   | .235    | -.920*               | -.975  |        |
| Procyanidin dimer B2 (PDB2)                         | .809                 | .211  | -.810                | -.345  | .295    | -.729                | -.847  |        |
| Procyanidin trimer C1 (PTC1)                        | .716                 | .086  | -.687                | -.470  | .239    | -.623                | -.889  |        |
| Procyanidin trimer C2 (PTC2)                        | .923*                | .309  | -.940*               | -.095  | .275    | -.870                | -.864  |        |
| Tryptophan (Try)                                    | .960*                | .311  | -.973*               | .038   | .222    | -.923*               | -.994* |        |
| Vitexin-7-olate (V)                                 | .960*                | .372  | -.991**              | .104   | .248    | -.931*               | -.995* |        |
| Isovitexin-7-olate (Ivi)                            | .963*                | .367  | -.992**              | .116   | .240    | -.935*               | -.594  |        |
| <b><i>Moringa oleifera</i></b>                      |                      |       |                      |        |         |                      |        |        |
| %CH <sub>4</sub> -Re (percentage methane reduction) | 1                    |       |                      |        |         |                      |        |        |
| TGP (total gas production)                          | -.936*               | 1     |                      |        |         |                      |        |        |
| CH <sub>4</sub> /TGP                                | -1.000**             | .935* | 1                    |        |         |                      |        |        |
| OMD (organic matter digestibility)                  | .597                 | -.647 | -.601                | 1      |         |                      |        |        |
| TGP/OMD                                             | -.857                | .853  | .860                 | -.925* | 1       |                      |        |        |

|                                               |         |        |         |       |       |         |       |
|-----------------------------------------------|---------|--------|---------|-------|-------|---------|-------|
| CH4/OMD                                       | -.999** | .936*  | 1.000** | -.626 | .875  | 1       |       |
| Extract Yield (EY)                            | -.454   | -.224  | .558    | -.858 | .893  | .885    | 1     |
| Alkaloids (A)                                 | .979*   | -.943* | -.977*  | .458  | -.756 | -.971*  | .997* |
| chlorogenic acid (Cl)                         | .793    | -.956* | -.791   | .669  | -.797 | -.795   | .140  |
| 3- <i>p</i> -coumaroylquinic acid (Ci)        | .998**  | -.958* | -.997** | .612  | -.864 | -.997** | -.083 |
| Feruloylquinic acid (F)                       | .325    | -.301  | -.318   | -.530 | .191  | -.288   | .961  |
| Kaempferol (K)                                | .998**  | -.955* | -.998** | .616  | -.867 | -.998** | -.534 |
| neochlorogenic acid (N)                       | .997**  | -.959* | -.997** | .597  | -.854 | -.996** | .605  |
| Quercetin (Q)                                 | .998**  | -.952* | -.998** | .590  | -.851 | -.997** | .999* |
| Rutin (R)                                     | .997**  | -.959* | -.997** | .613  | -.865 | -.997** | -.088 |
| <b>Piper betle</b>                            |         |        |         |       |       |         |       |
| %CH4-Re (percentage methane reduction)        | 1       |        |         |       |       |         |       |
| TGP (total gas production)                    | .299    | 1      |         |       |       |         |       |
| CH4/TGP                                       | -.938*  | -.608  | 1       |       |       |         |       |
| OMD (organic matter digestibility)            | .769    | -.236  | -.576   | 1     |       |         |       |
| TGP/OMD                                       | -.046   | .937*  | -.295   | -.549 | 1     |         |       |
| CH4/OMD                                       | -.997** | -.229  | .912*   | -.817 | .120  | 1       |       |
| Extract Yield (EY)                            | -.726   | .395   | -.133   | .029  | .368  | .583    | 1     |
| Apigenin                                      | .944*   | .495   | -.948*  | .516  | .195  | -.916*  | -.911 |
| chlorogenic acid (Cl)                         | .629    | .831   | -.842   | .314  | .617  | -.592   | .854  |
| 3- <i>p</i> -coumaroylquinic acid (Ci)        | .918*   | .626   | -.995** | .588  | .315  | -.893   | .772  |
| Coumaric acid (Cu)                            | .389    | .894   | -.668   | .078  | .767  | -.344   | .817  |
| Dihydrocaffeic acid (Dca)                     | .893    | .692   | -.986** | .440  | .408  | -.855   | -.170 |
| Dihydrocoumaric acid (Dcu)                    | .892    | .646   | -.985** | .581  | .340  | -.869   | .894  |
| Methoxy-4-vinylphenol (Met)                   | .972*   | .506   | -.986** | .612  | .184  | -.951*  | -.939 |
| Rutin (R)                                     | .954*   | .510   | -.966*  | .543  | .203  | -.927*  | -.900 |
| *correlated at p<0.05, **correlated at p<0.01 |         |        |         |       |       |         |       |

**Table S2.** Principal component loadings of fermentation parameters of *Eragrostis curvula* hay fermented with three different aqueous-methanol (70, 85 and 100%) extractions of *Aloe vera*, *Jatropha curcas*, *Moringa oleifera* and *Piper betle* leaf extracts.

| Variables/metabolites                  | PC<br>1×100 | PC<br>2×100 |
|----------------------------------------|-------------|-------------|
| <i>Aloe vera</i>                       |             |             |
| %CH4-Re (percentage methane reduction) | 1.14        | -3.79       |
| TGP (total gas production)             | 0.02        | -3.44       |
| CH4/TGP                                | -0.30       | 1.50        |
| OMD (organic matter digestibility)     | -0.39       | -0.51       |
| TGP/OMD                                | 0.07        | -5.65       |
| CH4/OMD                                | -0.08       | 0.26        |
| EY (Extract yield)                     | -0.08       | -0.57       |
| Aloin A (Aa)                           | 54.87       | -52.16      |
| Aloin B (Ab)                           | 49.59       | -26.85      |
| Aloe emodin (AE)                       | 23.27       | 8.44        |
| Aloesin (Alos)                         | 56.85       | 44.60       |
| Caffeoyl ester of aloesin (Ce)         | 9.07        | 12.60       |
| 3- <i>p</i> -coumaroylquinic acid (Ci) | 0.68        | -6.55       |
| Hydroxyaloin A (HA)                    | 6.94        | 50.54       |
| Hydroxyaloin B (HB)                    | 14.13       | 24.68       |

|                                                     |        |        |
|-----------------------------------------------------|--------|--------|
| Kaempferol hexoside                                 | 0.74   | -6.24  |
| Nataloin A (NA)                                     | 11.98  | 18.75  |
| Nataloin B (NB)                                     | 16.75  | 26.10  |
| % Variance                                          | 96.71  | 3.24   |
| <b><i>Jatropha curcas</i></b>                       |        |        |
| %CH <sub>4</sub> -Re (percentage methane reduction) | 2.21   | -2.00  |
| TGP (total gas production)                          | 0.50   | -3.81  |
| CH <sub>4</sub> /TGP                                | -0.62  | 0.96   |
| OMD (organic matter digestibility)                  | 0.13   | -15.76 |
| TGP/OMD                                             | 0.63   | 1.67   |
| CH <sub>4</sub> /OMD                                | -0.15  | 0.29   |
| EY (Extract yield)                                  | -0.006 | -0.62  |
| Apigenin (ApiA)                                     | 30.30  | -23.40 |
| Catechin (Cat)                                      | 66.18  | -14.27 |
| Epicatechin (Epi)                                   | 27.62  | 42.68  |
| Procyanidin dimer B1 (PDB1)                         | 22.82  | 5.27   |
| Procyanidin dimer B2 (PDB2)                         | 18.45  | 69.47  |
| Procyanidin trimer C1 (PTC1)                        | 5.87   | 33.86  |
| Procyanidin trimer C2 (PTC2)                        | 15.13  | 19.30  |
| Tryptophan (Try)                                    | 10.29  | 2.70   |
| Vitexin (Vit)                                       | 31.43  | -15.22 |
| Iso-vitexin (Ivi)                                   | 41.37  | -23.11 |
| % Variance                                          | 98.33  | 1.53   |
| <b><i>Moringa oleifera</i></b>                      |        |        |
| %CH <sub>4</sub> -Re (percentage methane reduction) | 2.07   | -1.12  |
| TGP (total gas production)                          | -0.17  | 0.08   |
| CH <sub>4</sub> /TGP                                | -0.49  | 0.30   |
| OMD (organic matter digestibility)                  | 0.46   | -6.13  |
| TGP/OMD                                             | -0.56  | 3.43   |
| CH <sub>4</sub> /OMD                                | -0.15  | 0.13   |
| EY (Extract yield)                                  | 0.004  | 0.81   |
| Alkaloids (A)                                       | 51.85  | 68.61  |
| 3- <i>p</i> -coumaroylquinic acid (Ci)              | 17.93  | -9.11  |
| Chlorogenic acid (Cl)                               | 5.45   | -5.51  |
| Feruloyl quinic acid (F)                            | 2.41   | 57.12  |
| Kaempferol (K)                                      | 68.56  | -40.05 |
| Neochlorogenic acid (N)                             | 33.34  | -10.47 |
| Quercetin hexoside (Q)                              | 29.16  | -8.61  |
| Rutin (R)                                           | 16.95  | -8.83  |
| % Variance                                          | 98.78  | 1.08   |
| <b><i>Piper betle</i></b>                           |        |        |
| %CH <sub>4</sub> -Re (percentage methane reduction) | 0.32   | -0.76  |
| TGP (total gas production)                          | 0.32   | 1.91   |
| CH <sub>4</sub> /TGP                                | -0.25  | -0.14  |
| OMD (organic matter digestibility)                  | 0.46   | -1.03  |
| TGP/OMD                                             | 0.26   | 4.19   |
| CH <sub>4</sub> /OMD                                | -0.06  | 0.07   |
| EY (Extract yield)                                  | -0.01  | 0.46   |
| Apigenin (Api)                                      | 13.74  | -10.53 |
| 3- <i>p</i> -coumaroylquinic acid (Ci)              | 26.13  | 24.78  |
| Chlorogenic acid (Cl)                               | 1.16   | 4.48   |

---

|                             |       |        |
|-----------------------------|-------|--------|
| Coumaric acid (Cu)          | 13.60 | 90.52  |
| Dihydrocaffeic acid (Dca)   | 8.48  | 5.29   |
| Dihydrocoumaric acid (Dcu)  | 16.65 | 21.52  |
| Methoxy-4-vinylphenol (Met) | 91.99 | -22.53 |
| Rutin (R)                   | 11.37 | -6.23  |
| % Variance                  | 95.56 | 4.27   |

---
